# Supplementary material for: Kidney glycolysis serves as a mammalian phosphate sensor that maintains phosphate homeostasis
Source: PubMed Central journal article supplement (PMC10104895; doi:10.1172/jci164610), 2023-04-17
Supplement: jci-133-164610-s118.pdf [file jci-133-164610-s118.pdf]

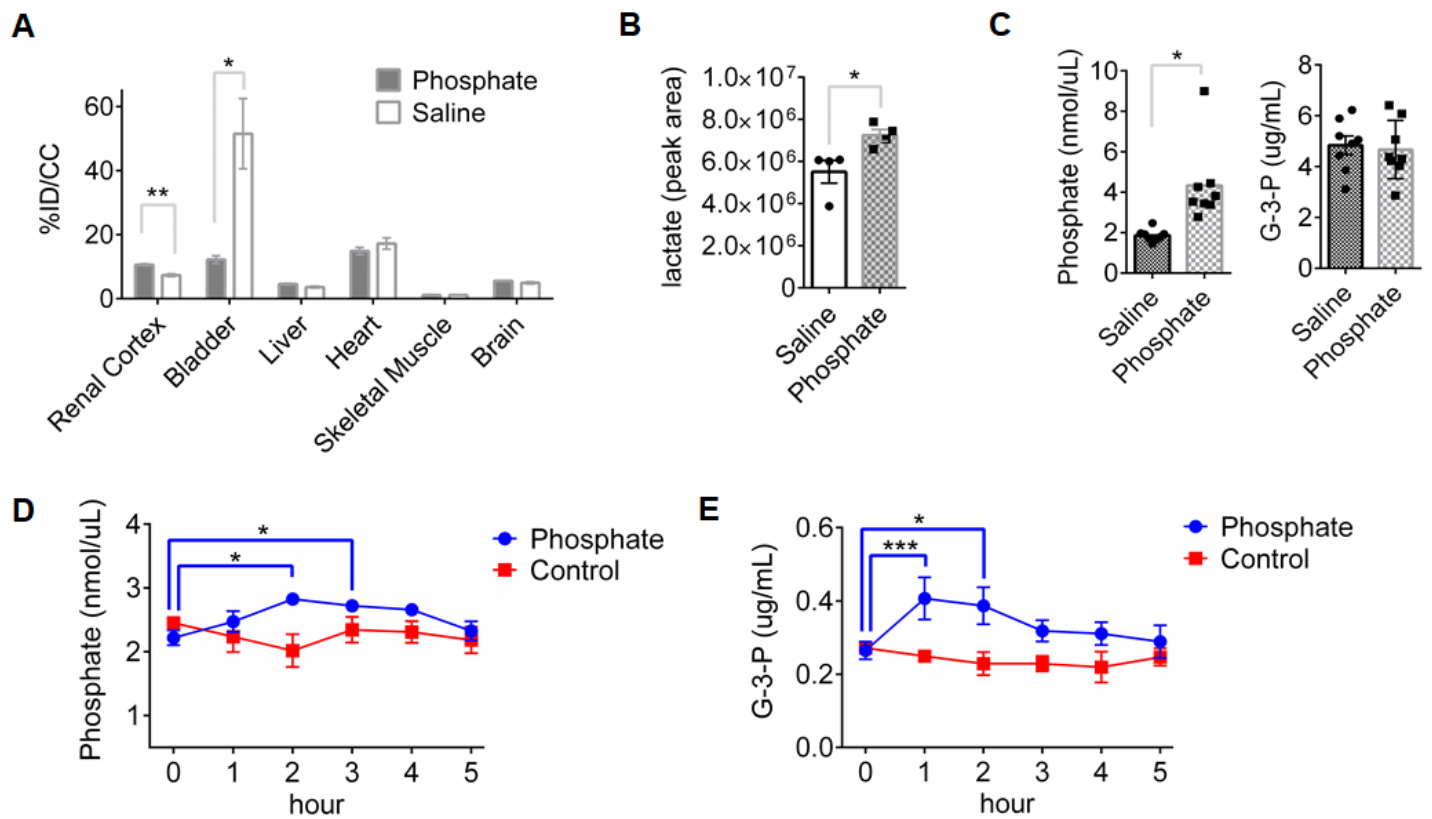

**Supplemental Figure 1. Phosphate-stimulated G-3-P production is kidney-dependent and occurs in humans.** (A) <sup>18</sup>F-FDG signal expressed as percent injected dose per cubic centimeter of tissue (%ID/CC) in renal cortex, bladder, liver, heart, skeletal muscle, and brain 10 min after i.v. <sup>18</sup>F-FDG and either sodium phosphate or sodium chloride in C57Bl/6J mice (n=4 per group). (B) Kidney lactate levels 10 min after i.v. sodium phosphate or sodium chloride (n=4 per group). (C) Blood phosphate and G-3-P concentrations 10 min after i.v. sodium phosphate or sodium chloride in C57Bl/6J that underwent bilateral renal artery and vein clamping (n=8 per group). (D, E) Blood phosphate (D) and G-3-P (E) concentrations in human subjects following phosphate (1.5g oral ingestion) or control (no ingestion) (n=3 per group). Values are means ± s.e.m. \*P<0.05, \*\*P<0.001, \*\*\*P<0.0001, unpaired t-test with Holm-Sidak method (A), unpaired student's t-test (B,C), or ANOVA with Dunnett's multiple comparisons test (D, E).

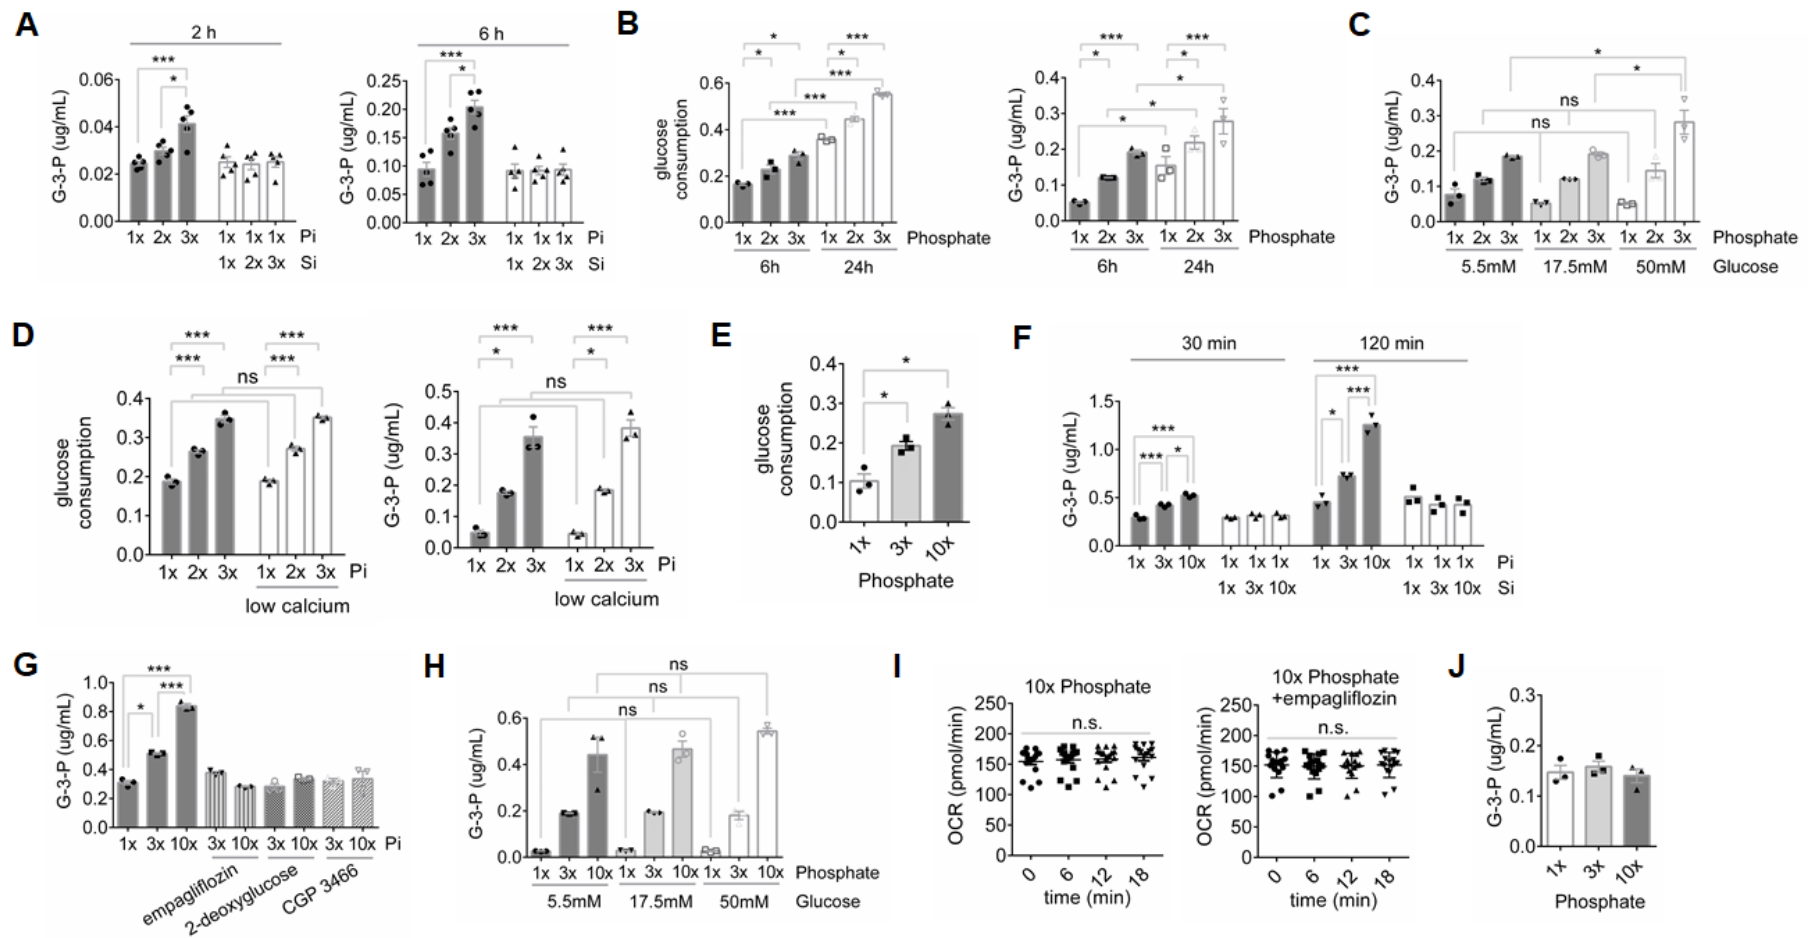

**Supplemental Figure 2. Phosphate stimulates glycolysis and G-3-P production in human proximal tubule cells and OK cells.** (A) Media G-3-P concentration at 2 hr and 6 hr from primary human proximal tubule cells incubated with increasing concentrations of sodium phosphate (Pi) or sodium sulfate (Si) (n=5 per group). (B) Media glucose consumption (left) and G-3-P concentrations (right) at 6hr and 24hr for primary human proximal tubule cells incubated with increasing concentrations of Pi (n=3 per group). (C) Media G-3-P concentrations at 6hr for primary human proximal tubule cells incubated with increasing concentrations of Pi in 5.5mM, 17.5mM, and 50mM glucose media (n=3 per group). (D) Media glucose consumption (left) and G-3-P concentrations (right) at 6hr for primary human proximal tubule cells incubated with increasing concentrations of Pi in normal calcium (20 mg/dL) or low calcium (14 mg/dL) media (n=3 per group). (E) Media glucose consumption at 120 min from OK cells incubated with increasing concentrations of Pi (n=3 per group). (F) Media G-3-P concentration at 30min and 120 min from OK cells incubated with increasing concentrations of Pi or Si (n=3 per group). (G) Media G-3-P concentration at 120 min from OK cells incubated with increasing concentrations of Pi ± empagliflozin (1μM), 2-deoxyglucose (25mM), or CGP 3466 (5μM) (n=3 per group). (H) Media G-3-P concentrations at 2hr for OK cells incubated with increasing concentrations of Pi in 5.5mM, 17.5mM, and 50mM glucose media (n=3 per group). (I) Oxygen consumption rate (OCR) measured by Seahorse in OK cells treated with 10x Pi ± empagliflozin (1μM) (n=16 per group). (J) Media G-3-P concentration at 2 hr from cultured osteocytes (Ocy454 cells) incubated with increasing concentrations of Pi (n=3 per group). 1x Pi and Si = 0.9mM. Values are means ± s.e.m. \*P<0.05, \*\*\*P<0.0001. ANOVA with Tukey's multiple comparisons test.

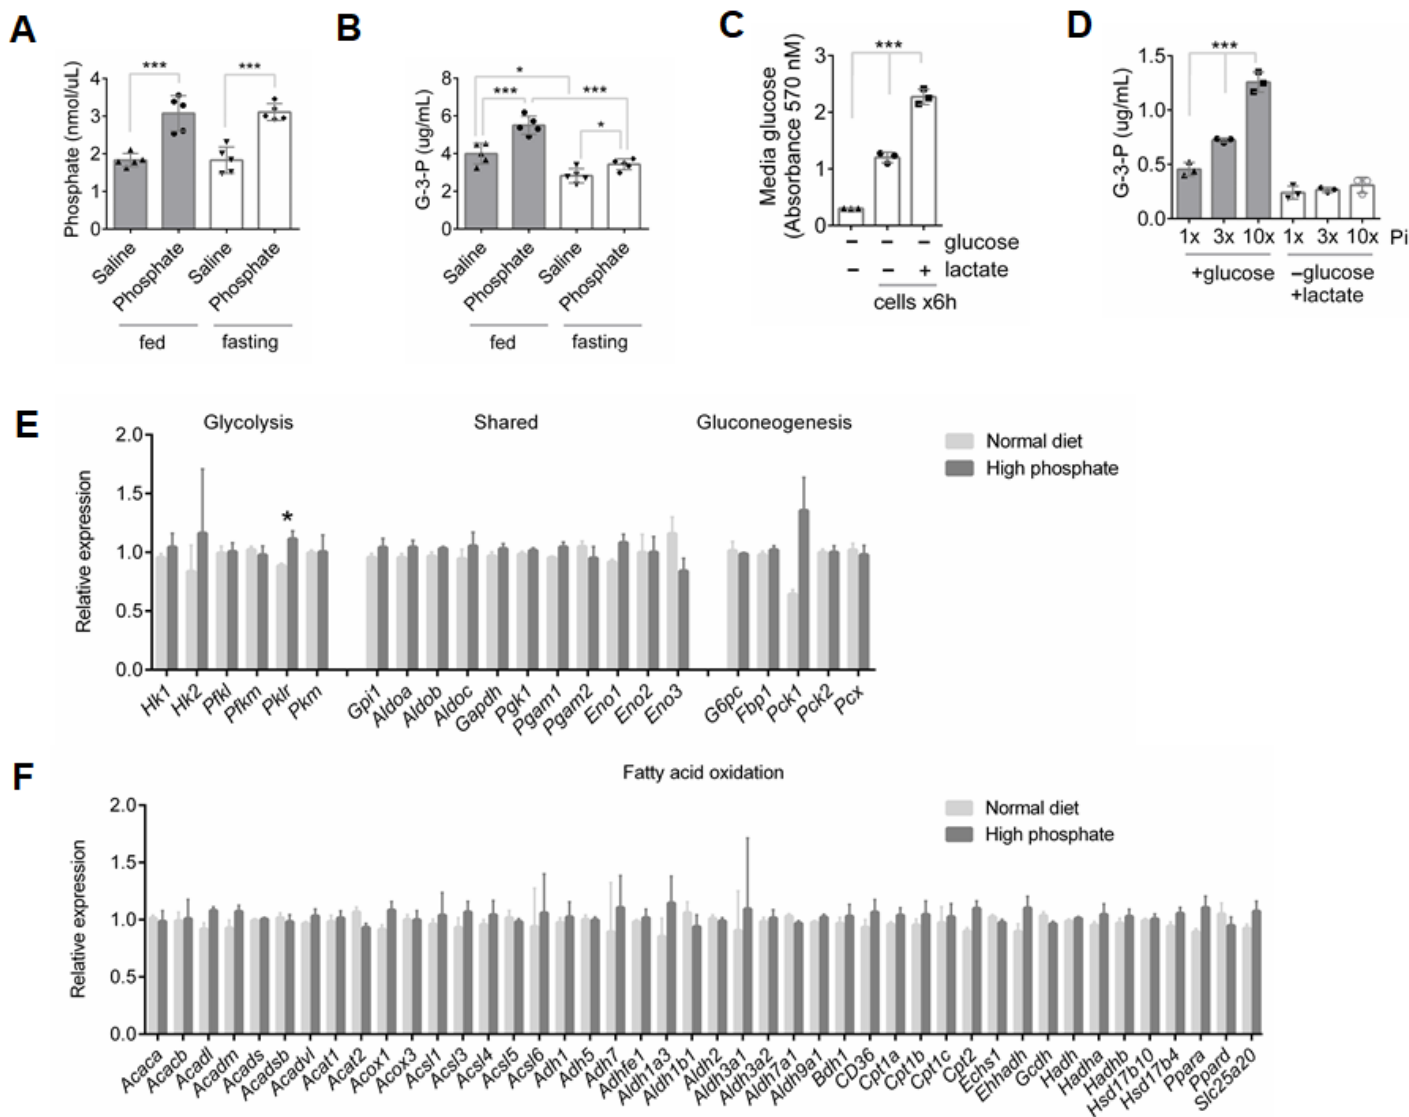

**Supplemental Figure 3. Phosphate stimulates G-3-P production in the fed state, without systematic changes in metabolic gene expression.** (A,B) Blood phosphate (A) and G-3-P (B) concentrations 10 min after i.v. sodium phosphate or sodium chloride in fed and fasted (12 hr) C57Bl/6J mice (n=5 per group). (C) Glucose in media alone and after 6 hr on OK cells incubated with glucose free media  $\pm$  lactate 10mM. (D) Media G-3-P from OK cells treated with increasing concentrations of phosphate (Pi) under glycolytic or gluconeogenic conditions for 6 hr. 1x Pi = 0.9mM. Values are means  $\pm$  s.e.m. \* $P$ <0.05, \*\*\* $P$ <0.0001. Unpaired student's t-test (A,B) or ANOVA with Tukey's multiple comparisons test (C,D). (E,F) Relative expression of genes involved in glycolysis and gluconeogenesis (E) and fatty acid oxidation (F) in kidney cortex of C57Bl/6J mice after 3 days on a high Pi (1.2%) or normal Pi (0.6%) diet (n=4 per group). \* $Q$ -value  $\leq$  0.05.

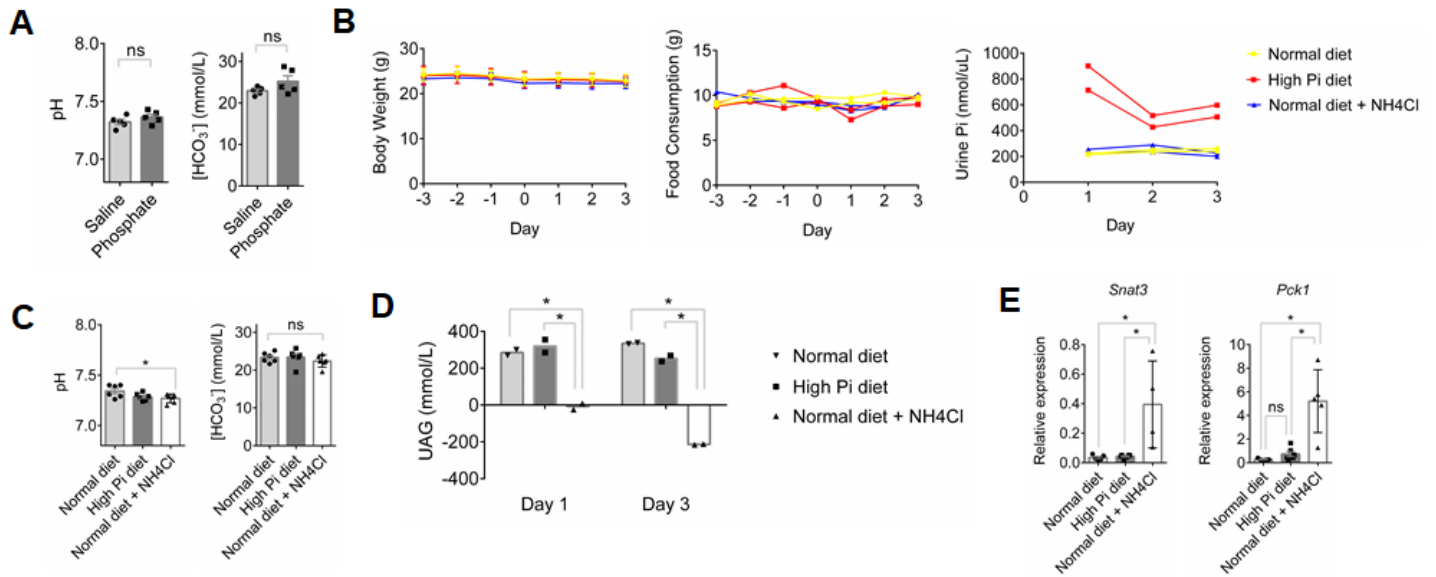

**Supplemental Figure 4. Supplemental sodium phosphate does not induce metabolic acidosis.** (A) Blood pH and bicarbonate concentrations in C57Bl/6J mice 10 min after i.v. sodium phosphate (6mg) or equimolar sodium chloride (2.7mg) (n=5 per group). (B-E) Daily body weight, food consumption, and urine phosphate (B), blood pH and bicarbonate concentrations (C), urine anion gap (UAG) (D), and kidney cortex *Snat3* and *Pck1* expression (E) in C57Bl/6J mice acclimated for 3 days (-3 to 0) and then maintained on normal diet (0.6% Pi) or transitioned to either high Pi (1.2%) diet or normal diet plus 0.28M NH<sub>4</sub>Cl drinking water for 3 days (0 to 3) (n=6 per group; note food consumption, urine phosphate, and UAG were assessed per metabolic cage, n=2 cages of 3 mice per diet group). Values are means ± s.e.m, or ± s.d. for body weight (B). \*P<0.05. Unpaired student's t-test (A) or ANOVA with Tukey's multiple comparisons test (C-E).

**A**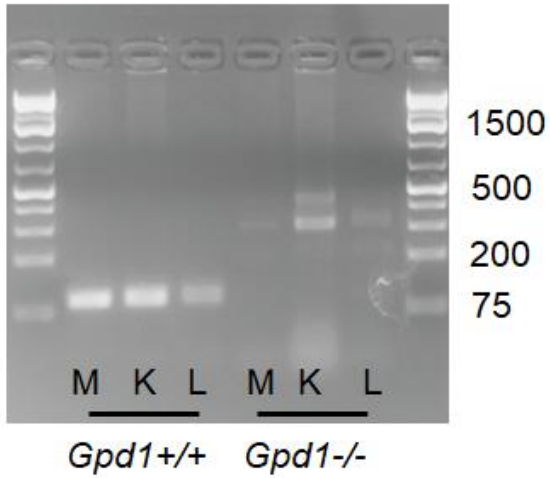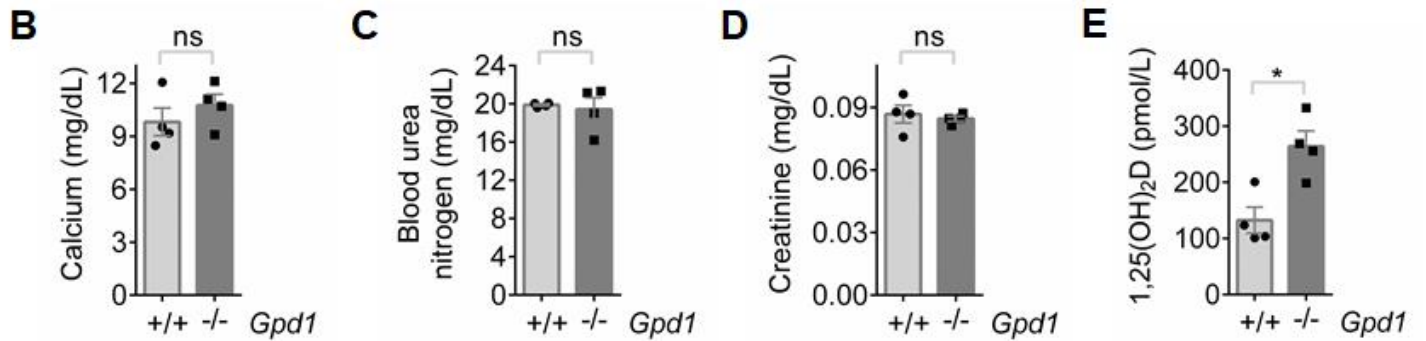

**Supplemental Figure 5. *Gpd1* deletion.** (A) PCR showing 134bp product of *Gpd1* exon 2 in muscle (M), kidney (K), and liver (L) tissue. (B-E) Blood calcium (B), urea nitrogen (C), creatinine (D), and 1,25(OH)<sub>2</sub>D (E) levels in *Gpd1*<sup>+/+</sup> and *Gpd1*<sup>-/-</sup> mice on a normal diet (n=4 per group). Values are means ± s.e.m. \**P*<0.05. Unpaired student's t-test (B-E).

**A**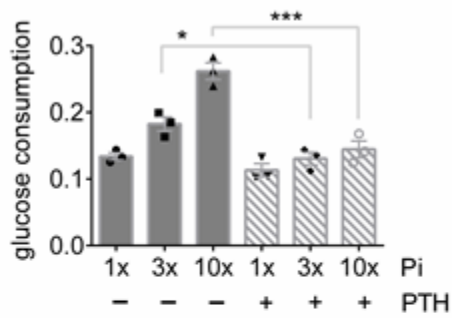**B**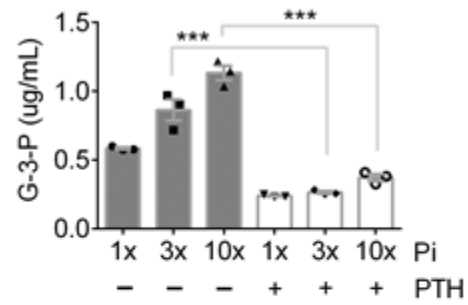**C**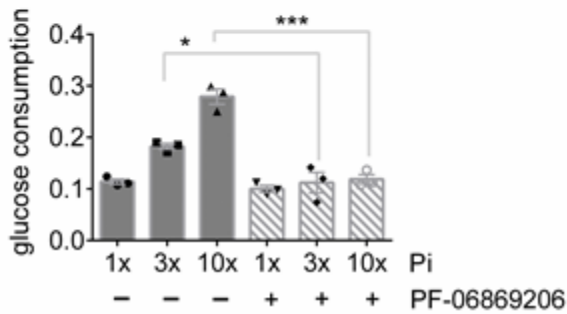**D**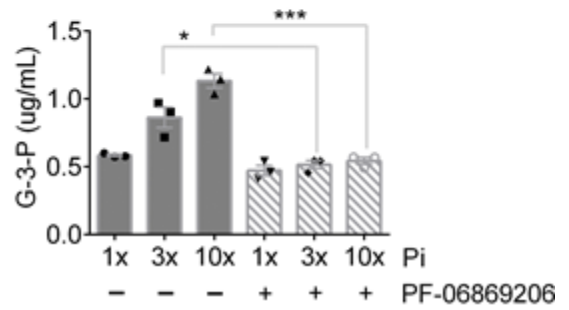

**Supplemental Figure 6. Npt2a inhibition abrogates phosphate-stimulated glycolysis and G-3-P production in vitro.** (A,B) Media glucose consumption (A) and G-3-P concentration (B) from OK cells treated with increasing concentrations of phosphate (Pi)  $\pm$  PTH (0.1  $\mu$ M) for 2 hr (n=3 per group). (C,D) Media glucose consumption (C) and G-3-P concentration (D) from OK cells treated with increasing concentrations of phosphate  $\pm$  PF-06869206 (10  $\mu$ M) for 2 hr (n=3 per group). 1x = 0.9mM. Values are means  $\pm$  s.e.m. \* $P$ <0.05, \*\*\* $P$ <0.0001. ANOVA with Tukey's multiple comparisons test.

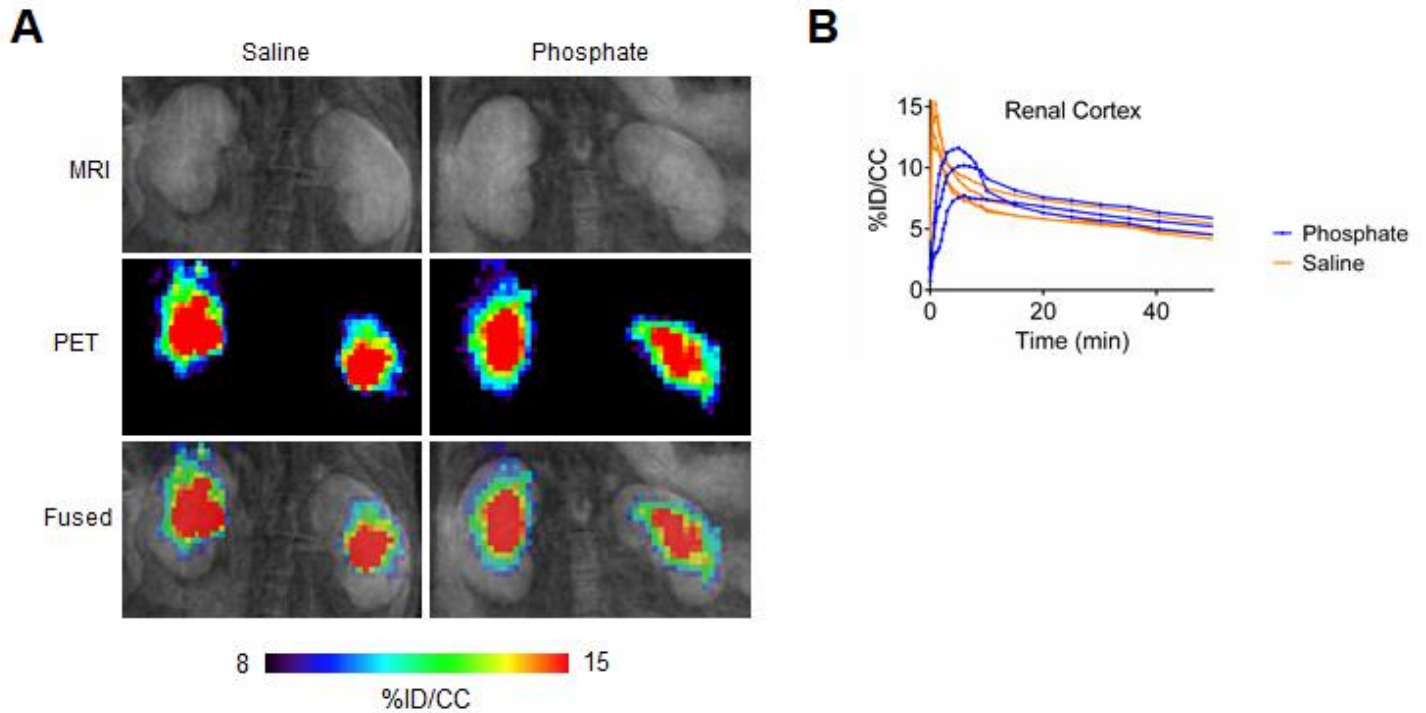

**Supplemental Figure 7. Phosphate-stimulated glycolysis is attenuated in *Npt2a*<sup>-/-</sup> mice.** (A) Representative kidney coronal MRI, PET, and fused images 10 min after i.v. <sup>18</sup>F-FDG and either sodium phosphate or sodium chloride in *Npt2a*<sup>-/-</sup> mice. (B) <sup>18</sup>F-FDG signal expressed as percent injected dose per cubic centimeter of tissue (%ID/CC) in renal cortex following i.v. <sup>18</sup>F-FDG and either sodium phosphate or sodium chloride in *Npt2a*<sup>-/-</sup> mice (n=3-4 per group).
